# Supplementary material for: Investigation of the Differential Contributions of Superficial and Deep Muscles on Cervical Spinal Loads with Changing Head Postures
Source: PLoS One. 2016 Mar 3;11(3):e0150608. doi: 10.1371/journal.pone.0150608 (PMC4777436; doi:10.1371/journal.pone.0150608)
Supplement: S6 Table — Spinal load, sum of muscle forces, and force ratio of deep muscles to superficial muscles (FR) during flexion, extension, left and right lateral bending for each subject. (XLSX) [file pone.0150608.s006.xlsx]

## Sheet: Spinal Load
FLEX_10								EXT_10								LB_10								RB_10
Subject	Compression	Shear_ml	Shear_ap	MForce_d	MForce _s	FR		Subject	Compression	Shear_ml	Shear_ap	MForce_d	MForce _s	FR		Subject	Compression	Shear_ml	Shear_ap	MForce_d	MForce _s	FR		Subject	Compression	Shear_ml	Shear_ap	MForce_d	MForce _s	FR
1	-638.057	0.2147	-201.29	429.637	242.499	1.78213		1	-622.304	2.1618	-119.098	452.384	189.611	2.391		1	-623.609	-37.5097	-162.771	443.787	206.722	2.1795		1	-631.591	36.8197	-150.245	421.402	237.286	1.78955
2	-590.5	1.761	-195.417	432.814	176.62	2.4531		2	-548.109	0.732667	-105.004	380.961	168.95	2.29337		2	-565.861	-38.7001	-148.927	397.094	178.47	2.22843		2	-560.365	38.4019	-149.09	405.446	164.302	2.46917
3	-478.937	-0.0347333	-154.755	412.969	69.8623	5.918		3	-420.044	1.5908	-77.3177	340.748	65.4008	5.21267		3	-446.427	-34.5542	-112.87	373.466	67.6734	5.5258		3	-446.97	35.9613	-112.333	370.727	71.1783	5.23037
4	-480.612	0.4923	-162.598	411.296	89.1851	4.6337		4	-431.944	0.729633	-91.286	365.353	70.0604	5.21707		4	-453.862	-31.7205	-125.037	386.172	79.1101	4.89617		4	-453.582	32.7378	-125.394	386.961	77.9912	4.96163
5	-566.994	-4.0842	-185.351	407.784	187.939	2.1791		5	-534.62	0.7696	-108.289	396.06	151.601	2.639		5	-542.514	-34.5022	-150.188	406.582	156.037	2.6071		5	-550.046	36.7859	-148.894	400.295	170.518	2.35987
6	-652.357	-0.4902	-211.423	465.202	212.795	2.1886		6	-627.898	-0.517467	-121.737	471.211	166.001	2.83883		6	-634.837	-40.2932	-164.417	465.389	186.108	2.50063		6	-638.888	40.1038	-165.213	459.265	196.828	2.3349
7	-413.836	-6.84567	-133.538	317.945	121.825	2.6385		7	-387.999	0.4901	-76.0094	273.006	129.768	2.1287		7	-402.442	-34.4544	-105.599	321.223	102.213	3.14813		7	-398.755	26.759	-106.042	307.383	111.533	2.79093
8	-482.393	2.6748	-161.231	405.154	97.2563	4.18917		8	-434.394	1.50467	-91.3985	362.412	75.7609	4.8199		8	-457.89	-32.631	-126.104	389.854	79.9522	4.88127		8	-457.248	33.4153	-123.815	385.057	83.0357	4.5845
9	-557.49	-2.5492	-175.61	371.759	201.164	1.87293		9	-489.432	-0.3838	-91.9437	345.667	140.364	2.47583		9	-528.715	-40.2199	-128.273	352.375	183.028	1.94353		9	-519.44	37.1904	-133.316	351.657	173.298	2.12943
10	-542.05	3.06997	-168.229	397.418	149.901	2.68013		10	-456.005	0.971633	-84.2767	342.86	97.4709	3.5239		10	-498.001	-39.7213	-120.132	357.114	135.951	2.6585		10	-492.363	37.8962	-122.718	370.355	116.167	3.1887
11	-558.92	-0.701833	-195.957	379.418	217.055	1.80257		11	-525.38	-1.28383	-109.651	373.784	172.404	2.21723		11	-540.849	-37.3378	-151.422	362.3	207.756	1.75093		11	-561.559	38.5632	-152.932	348.01	244.533	1.4433
12	-665.15	-1.11603	-211.759	440.829	247.429	1.7827		12	-635.845	-0.462733	-119.35	458.048	183.873	2.49257		12	-639.437	-41.573	-163.384	458.668	193.964	2.37093		12	-646.179	41.2387	-163.944	457.621	202.178	2.26613
13	-647.013	0.766533	-210.187	463.788	212.399	2.19053		13	-622.026	0.634667	-121.669	467.456	167.775	2.78627		13	-632.676	-39.4634	-163.918	458.785	194.761	2.36517		13	-626.84	39.8001	-163.752	461.499	185.509	2.48777
14	-492.856	2.25835	-155.84	342.436	184.504	1.8696		14	-445.159	0.2074	-93.4556	348.876	116.221	3.0047		14	-468.256	-27.8518	-130.066	339.107	156.436	2.189		14	-480.565	33.6831	-122.968	340.889	168.063	2.02845
15	-477.645	-0.15005	-157.22	382.895	118.873	3.2219		15	-435.854	-0.9969	-87.0762	348.767	97.4496	3.57895		15	-451.789	-32.9136	-120.064	364.985	103.71	3.55785		15	-454.518	30.0484	-120.515	356.568	114.76	3.1264
16	-475.602	1.7858	-161.136	388.954	112.496	3.4602		16	-463.605	2.0353	-90.2467	364.314	113.481	3.2184		16	-462.486	-27.3357	-120.645	355.156	126.649	2.8045		16	-459.363	33.0127	-126.683	374.091	104.273	3.58935
17	-457.373	-1.73225	-145.907	358.513	121.537	2.9503		17	-409.031	0.49585	-85.6209	341.232	75.4122	4.5317		17	-428.949	-29.3321	-115.99	321.592	122.469	2.6501		17	-427.595	31.5745	-117.801	353.52	89.1281	3.9787
Mean	-539.87	-0.275336	-175.732	400.518	162.55	2.81254		Mean	-499.391	0.510552	-98.4371	378.42	128.33	3.25706		Mean	-516.388	-35.3008	-135.871	385.509	145.942	2.95633		Mean	-517.992	35.5289	-135.627	385.338	147.681	2.98583
SD	77.8125	2.53232	24.7507	40.1022	56.2042	1.1654		SD	84.9462	0.99962	15.5933	54.3816	42.7848	1.06006		SD	79.3173	4.52788	20.2694	47.0359	47.5192	1.11516		SD	81.1322	3.91802	19.2988	44.3049	55.7224	1.12515
FLEX_20								EXT_20								LB_20								RB_20
Subject	Compression	Shear_ml	Shear_ap	MForce_d	MForce _s	FR		Subject	Compression	Shear_ml	Shear_ap	MForce_d	MForce _s	FR		Subject	Compression	Shear_ml	Shear_ap	MForce_d	MForce _s	FR		Subject	Compression	Shear_ml	Shear_ap	MForce_d	MForce _s	FR
1	-657.329	0.786367	-248.535	424.79	280.25	1.52007		1	-634.38	0.824267	-74.6581	451.209	203.778	2.2157		1	-625.998	-73.5749	-156.893	431.21	226.256	1.90943		1	-646.093	79.618	-136.8	412.146	262.867	1.5526
2	-623.986	0.576567	-247.145	455.824	203.444	2.2445		2	-533.406	0.9572	-63.3676	373.929	159.477	2.34577		2	-583.218	-86.1322	-145.051	384.684	216.534	1.78083		2	-557.453	76.4246	-145.405	398.273	173.866	2.29387
3	-512.529	0.564733	-198.762	458.346	73.1939	6.26663		3	-397.465	-0.212133	-42.4315	311.759	69.2406	4.50597		3	-442.14	-70.0028	-110.127	369.975	72.246	5.12313		3	-442.512	70.4817	-109.295	368.667	73.9786	5.00153
4	-505.397	0.928333	-204.078	441.149	97.7302	4.5293		4	-411.601	0.423433	-58.477	345.312	66.771	5.17193		4	-452.554	-63.6463	-121.611	379.107	89.5682	4.23777		4	-449.725	66.1282	-122.394	381.404	84.3429	4.5277
5	-588.936	-2.33617	-231.533	430.671	200.593	2.1481		5	-549.749	2.84753	-63.4	379.371	184.738	2.05817		5	-541.957	-71.0601	-147.501	395.981	171.427	2.3126		5	-549.834	74.9612	-145.982	397.139	178.84	2.22587
6	-672.491	-0.9433	-260.952	471.855	241.246	1.95717		6	-626.699	-0.648733	-78.4203	470.596	164.695	2.86523		6	-636.345	-82.1695	-161.633	453.357	205.904	2.2024		6	-636.368	80.6784	-162.144	451.944	207.417	2.17897
7	-430.008	-5.99573	-173.604	344.676	122.831	2.84823		7	-383.583	-1.41573	-40.1011	260.318	138.057	1.89863		7	-395.073	-57.3194	-94.877	301.328	118.07	2.58467		7	-394.944	60.1706	-101.876	309.633	110.063	2.8191
8	-508.734	3.58623	-202.831	435.731	106.583	4.15287		8	-414.135	1.40533	-56.8075	339.834	75.4215	4.5654		8	-466.099	-68.0688	-122.688	384.518	99.8978	3.881		8	-453.537	66.7633	-120.937	375.087	96.8436	4.0074
9	-592.262	-1.32233	-223.766	420.715	201.676	2.09483		9	-464.908	-0.466733	-56.3179	327.998	130.253	2.5241		9	-561.106	-91.1585	-115.475	352.887	225.839	1.5692		9	-508.384	74.1355	-130.845	371.861	146.389	2.58473
10	-588.959	3.33453	-221.073	458.081	153.151	3.0246		10	-425.773	0.425767	-47.1135	309.624	96.9871	3.20427		10	-492.173	-76.2191	-117.053	356.667	135.53	2.6319		10	-492.322	76.6467	-115.522	347.643	145.307	2.5351
11	-567.549	-1.09113	-237.927	419.302	198.436	2.11323		11	-516.039	-1.3362	-71.414	377.758	157.742	2.41077		11	-545.274	-74.1643	-149.856	347.264	233.556	1.49457		11	-562.384	77.3595	-149.591	350.344	249.778	1.40967
12	-691.973	-1.70907	-260.619	442.459	287.914	1.537		12	-639.76	-0.0927667	-72.7999	460.376	185.588	2.48257		12	-636.917	-82.823	-159.81	452.415	203.621	2.22523		12	-647.932	85.3302	-160.824	451.746	216.401	2.09037
13	-670.298	0.3377	-260.18	471.186	243.378	1.9361		13	-624.234	0.51	-77.6705	466.934	170.395	2.7598		13	-629.072	-79.9929	-161.038	455.738	199.764	2.2815		13	-626.973	80.538	-160.735	454.232	198.941	2.28467
14	-512.482	2.1653	-207.385	372.136	187.41	1.98645		14	-440.89	2.89265	-60.3607	333.765	126.257	2.6454		14	-474.712	-59.4068	-107.631	329.252	175.875	1.87335		14	-476.944	66.1761	-117.02	336.554	173.162	1.9497
15	-502.33	-1.4056	-196.094	407.36	130.786	3.1147		15	-446.87	-3.8337	-42.473	316.075	144.024	2.1964		15	-448.913	-61.4321	-117.325	359.416	110.38	3.25815		15	-475.727	60.9938	-96.6232	336.459	160.308	2.22485
16	-503.83	1.87005	-201.03	401.593	141.091	2.84795		16	-454.385	-0.5242	-49.9587	337.851	130.484	2.58975		16	-461.724	-57.685	-105.161	331.624	153.048	2.168		16	-462.375	64.2125	-118.254	355.959	130.289	2.7329
17	-485.624	-1.0791	-187.972	375	146.226	2.56525		17	-396.387	-0.2711	-49.4952	313.374	89.6432	3.496		17	-435.87	-59.0879	-96.6074	293.554	161.514	1.8197		17	-428.486	59.0147	-109.68	332.301	115.872	2.8776
Mean	-565.572	-0.101919	-221.382	425.346	177.408	2.75806		Mean	-491.78	0.0873461	-59.1333	363.299	134.915	2.9374		Mean	-519.361	-71.4085	-128.843	375.234	164.649	2.5502		Mean	-518.353	71.7431	-129.643	378.317	160.274	2.66451
SD	77.8948	2.31208	27.611	36.1007	63.1561	1.22658		SD	92.5017	1.58242	12.713	63.4876	42.7607	0.957116		SD	80.8602	10.6588	23.7227	50.2181	52.4887	1.00996		SD	82.4255	8.11828	21.2895	44.1461	55.4212	0.980698
FLEX_30								EXT_30								LB_terminal								RB_terminal
Subject	Compression	Shear_ml	Shear_ap	MForce_d	MForce _s	FR		Subject	Compression	Shear_ml	Shear_ap	MForce_d	MForce _s	FR		Subject	Compression	Shear_ml	Shear_ap	MForce_d	MForce _s	FR		Subject	Compression	Shear_ml	Shear_ap	MForce_d	MForce _s	FR
1	-677.778	0.5655	-303.526	432.103	312.029	1.3875		1	-651.789	0.495067	-25.6597	454.958	224.512	2.03083		1	-531	-97	-130	434.094	223.63	1.93		1	-656.165	105.379	-136.429	410.066	284.265	1.403
2	-656.422	0.897167	-304.684	488.213	225.075	2.17293		2	-518.98	0.446367	-24.1067	368.255	152.987	2.41463		2	-595.648	-119.809	-140.071	392.784	229.83	1.7323		2	-568.182	119.255	-138.732	379.606	215.014	1.77693
3	-544.688	-0.156967	-247.391	501.96	81.8607	6.13607		3	-373.362	0.478767	-8.08727	282.343	75.4934	3.74337		3	-437.985	-88.7785	-109.232	369.431	72.5601	4.3481		3	-438.076	90.9973	-107.279	366.773	76.234	4.83323
4	-533.04	0.8034	-249.073	469.544	115.001	4.08977		4	-393.724	0.332333	-26.2144	324.799	70.2094	4.6364		4	-498	-101	-115	377.734	90.8059	3.15		4	-446.399	81.8363	-120.251	381.558	84.3387	4.52895
5	-617.507	-2.65987	-284.036	454.618	224.246	2.03247		5	-558.446	3.49093	-17.1635	368.968	209.09	1.80227		5	-539.396	-97.9168	-144.337	390.196	180.893	2.15713		5	-548.254	111.863	-141.497	392.907	190.456	2.0661
6	-702.696	-0.867633	-319.292	469.884	294.821	1.606		6	-628.203	-0.921067	-33.8098	483.245	158.117	3.0576		6	-634.223	-125.909	-156.634	434.473	233.198	1.86613		6	-633.032	118.942	-156.425	435.796	229.28	1.9032
7	-455.813	-3.45287	-212.211	372.757	135.804	2.75517		7	-393.571	-1.73133	-4.30353	253.452	160.475	1.58837		7	-489	-105	-134	277.127	151.931	1.82		7	-384.229	89.3128	-97.9339	308.371	106.511	2.9018
8	-548.052	2.01917	-252.157	449.738	151.792	3.1695		8	-398.69	2.21673	-24.013	319.194	81.7993	3.9502		8	-503	-94	-122	386.448	104.964	3.67		8	-478.44	91.1667	-109.52	367.367	115.965	2.4836
9	-601	-1	-273	425.534	239.076	2.51		9	-444.944	0.1211	-19.3788	312.507	127.186	2.46263		9	-595	-111	-132	368.741	231.669	1.59		9	-508.023	100.103	-126.497	356.659	167.297	2.1713
10	-646.018	5.54903	-286.268	518.483	175.255	2.9902		10	-408.032	-0.457733	-9.60417	280.511	109.937	2.60397		10	-480.868	-115.693	-110.832	350.832	139.933	2.51423		10	-480.182	102.173	-110.767	352.83	133.947	2.63587
11	-586.157	-0.770533	-276.208	431.789	218.944	1.97303		11	-510.979	-1.1449	-33.2551	378.064	155.545	2.4402		11	-548.538	-106.255	-146.415	347.144	246.233	1.4157		11	-562.823	105.548	-145.322	353.334	254.211	1.39507
12	-721.203	-1.57997	-318.85	456.542	323.638	1.41247		12	-655.103	1.50623	-22.1374	465.752	202.378	2.30517		12	-635.086	-125.641	-155.328	428.964	235.659	1.82207		12	-643.293	129.131	-156.16	437.735	236.208	1.8533
13	-741.527	1.75633	-327.437	482.512	328.54	1.46893		13	-631.57	1.10997	-31.7992	476.504	173.68	2.74807		13	-628.52	-113.273	-157.53	446.473	216.323	2.06447		13	-635.43	119.193	-156.363	441.993	229.402	1.9301
14	-551.546	1.42245	-246.325	363.176	251.246	1.4464		14	-440.237	2.15565	-21.0949	310.553	152.963	2.0334		14	-469.25	-83.643	-111.507	326.648	178.515	1.84105		14	-506.501	106.378	-110.967	347.542	205.34	1.6947
15	-603	1	-275	417.471	147.155	2.53		15	-442.601	-1.71895	6.19205	291.966	170.762	1.7139		15	-447.794	-89.69	-102.707	332.678	143.09	2.32495		15	-457.226	93.4102	-98.8096	322.385	162.478	2.0357
16	-531.194	1.9238	-247.89	435.842	151.446	2.87825		16	-457.704	-2.0803	-5.28795	315.847	161.73	1.95285		16	-468.789	-93.5388	-98.6634	320.097	179.592	1.8081		16	-456.425	97.4269	-107.467	338.815	149.322	2.2693
17	-513.324	-1.96845	-230.923	389.386	175.776	2.3486		17	-396.303	0.2101	-8.18305	288.9	119.506	2.42245		17	-439.699	-93.4004	-91.6995	285.707	181.248	1.5991		17	-428.871	91.5444	-99.382	309.005	147.353	2.1302
Mean	-601.798	0.232038	-273.751	444.679	208.924	2.52449		Mean	-488.485	0.265233	-18.1121	351.519	147.433	2.58272		Mean	-527.15	-104.462	-127.08	368.798	178.828	2.20778		Mean	-519.503	103.157	-124.694	370.749	175.742	2.35367
SD	85.6459	2.258	35.7715	43.2691	75.7055	1.27209		SD	100.718	1.53182	11.4601	75.4796	45.1754	0.837014		SD	79.4791	15.1752	25.0769	50.7491	54.5188	1.03467		SD	84.882	13.1049	21.3674	42.1878	61.2842	0.960905
FLEX_terminal								EXT_terminal
Subject	Compression	Shear_ml	Shear_ap	MForce_d	MForce _s	FR		Subject	Compression	Shear_ml	Shear_ap	MForce_d	MForce _s	FR
1	-686.479	0.688533	-331.507	446.627	316.776	1.41587		1	-678.915	0.4087	31.6915	474.531	247.682	1.92037
2	-691.503	1.05093	-363.097	511.477	262.401	1.96123		2	-514.082	0.257267	13.4051	358.735	164.881	2.22417
3	-561.413	0.522733	-280.725	534.9	81.672	6.55453		3	-348.032	0.955833	18.0205	265.732	69.0738	3.84933
4	-650	-1	-340	476.821	108.677	4.27		4	-374.729	0.319833	3.5097	309.991	69.8326	4.4598
5	-636.245	-2.6183	-328.452	481.09	235.003	2.0479		5	-567.039	0.1178	30.7329	353.452	244.198	1.47537
6	-736.233	-0.661067	-374.211	488.675	332.517	1.47677		6	-640.667	-1.27303	14.0623	496.083	168.977	2.94327
7	-470.632	-0.5597	-263.088	420.29	125.708	3.35677		7	-399.909	-2.7223	34.003	257.269	173.283	1.49327
8	-563.642	2.7532	-277.881	473.921	141.223	3.2649		8	-377.753	0.996033	4.7905	307.654	75.771	4.06647
9	-660	3	-303	475	220	2.01		9	-429.685	-0.617367	16.647	303.117	126.905	2.38853
10	-693.19	5.50497	-354.243	578.233	193.974	2.98193		10	-402.457	0.597833	25.0446	277.392	113.037	2.52733
11	-630	2	-320	448.791	209.9	2.13		11	-506.004	-1.03183	0.398567	383.866	152.309	2.54713
12	-758.852	-0.996267	-382.553	466.477	377.226	1.23837		12	-661.539	1.01533	29.3139	474.378	212.941	2.24857
13	-781.667	1.7975	-372.713	501.563	367.837	1.3639		13	-636.028	0.788233	14.1174	494.136	171.514	2.88297
14	-568.862	2.07705	-306.934	428.53	226.781	1.8899		14	-457.24	1.39935	23.733	306.502	185.383	1.65735
15	-598	2	-330	479	222	1.71		15	-409.723	-1.4531	25.6557	294.291	137.657	2.1884
16	-549.895	0.60005	-282.459	447.9	172.889	2.59315		16	-435.486	0.4063	33.3522	296.464	166.613	1.78395
17	-537.446	1.9864	-284.904	442.298	169.864	2.6286		17	-376.56	-0.4096	22.2478	275.275	118.428	2.3257
Mean	-633.543	0.93431	-323.29	476.506	221.497	2.52106		Mean	-483.285	-0.0143951	20.0427	348.757	152.852	2.52835
SD	97.877	2.01738	42.9057	42.255	93.6458	1.41368		SD	112.905	1.09376	10.6224	84.525	54.1368	0.878533
